# Supplementary material for: Aberrant neurophysiological signaling associated with speech impairments in Parkinson’s disease
Source: PubMed Central journal article supplement (PMC10104849; doi:10.1038/s41531-023-00495-z), 2023-04-14
Supplement: 41531_2023_495_MOESM1_ESM.pdf [file 41531_2023_495_MOESM1_ESM.pdf]

# Supplementary Information for *Aberrant neurophysiological signaling associated with speech impairments in Parkinson's disease*

## Materials & Methods

### *Sentences for Repetition*

#### English:

- *The mother washes her child.* (easy)
- *Her hair got tangled in the wind.* (easy)
- *I can't remember where I put my brand new bag* (hard)
- *They caught some trout while they were fishing on the lake* (hard)

#### French:

- *Je cherche un nouveau manteau.* (easy)
- *Je veux le plus petit morceau.* (easy)
- *Les chevaux ont eu très peur lors de l'incendie.* (hard)
- *Le gros chien a attaqué l'homme très soudainement.* (hard)

## Supplementary Figures

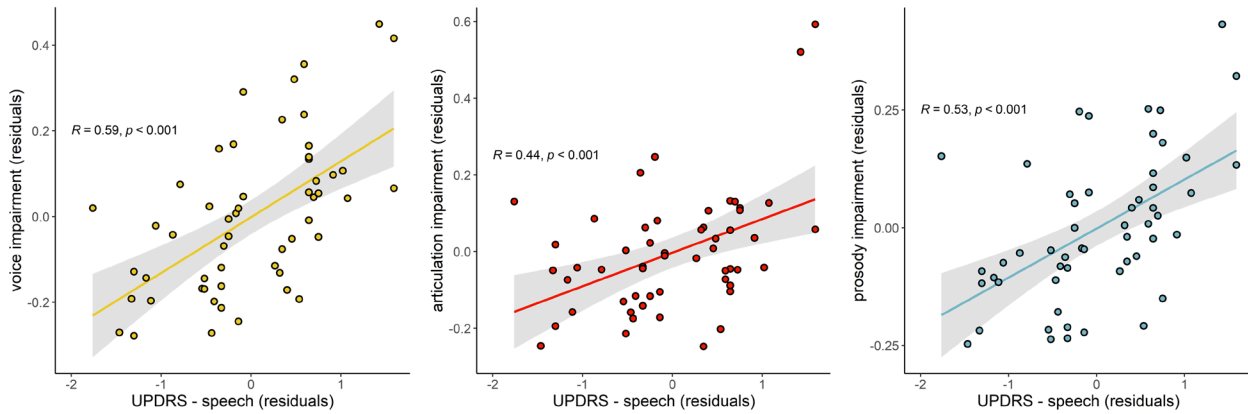

**Supplementary Figure 1. Non-expert speech impairment ratings are associated with clinical motor speech assessments.** Significant linear relationships between voice, articulation, and prosody impairments and the speech sub-score of the Unified Parkinson's Disease Rating Scale part III. All models controlled for age. Shaded intervals represent the 95% confidence interval.

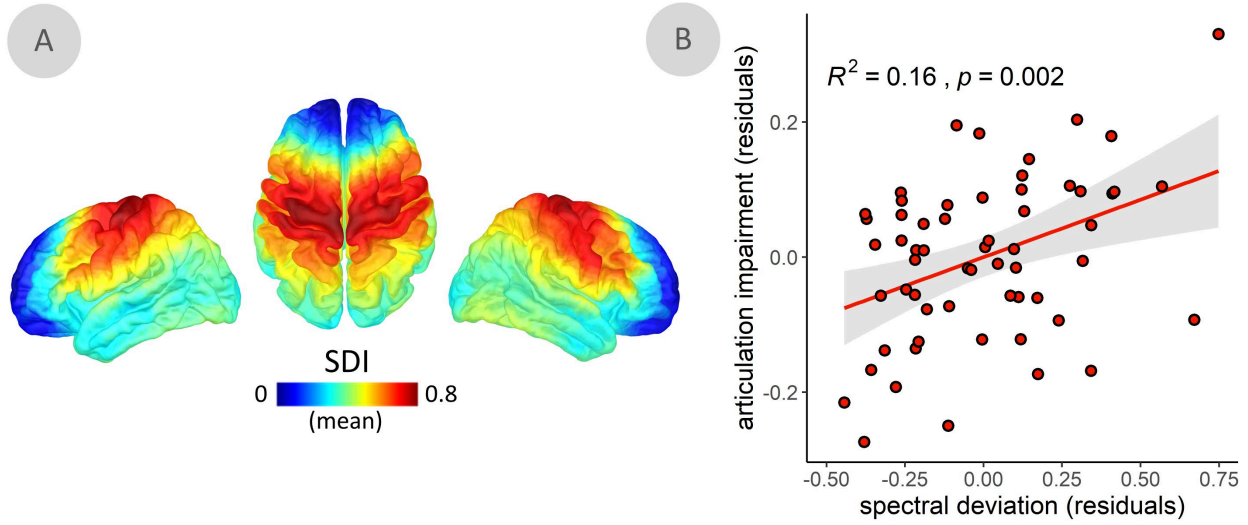

**Supplementary Figure 2. Spectral deviations computed using all spectral power densities from 2 – 30 Hz.** Spectral Deviation Index (SDI) values computed using all spectral power density estimates from 2 – 30 Hz exhibit similar (A) spatial patterns and (B) relationships to articulatory impairments as those seen in Figures 2B and 3B, respectively.

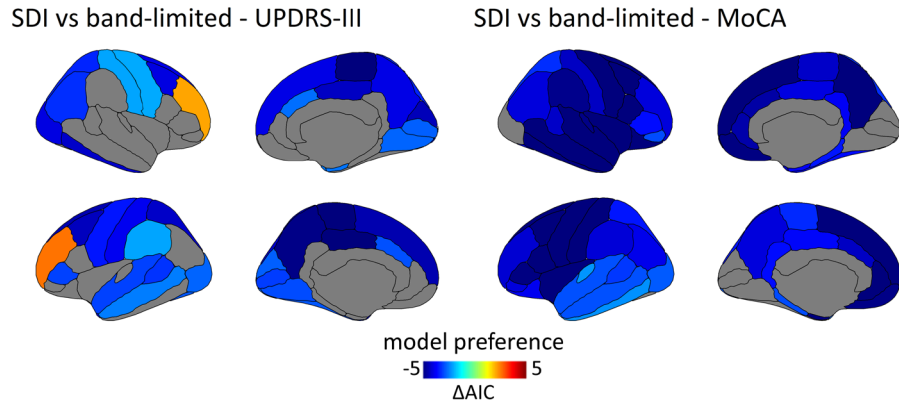

**Supplementary Figure 3. The Spectral Deviation Index (SDI) outperforms a band-limited model of cognitive and motor impairments.** Per each region of the Desikan-Killiany atlas, model comparisons were performed between the SDI model and a band-limited model (i.e., with spectral power in all four frequencies as independent variables), with clinical function as the dependent variables (UPDRS-III, left; MoCA, right), covarying the effect of age. Differences in the Akaike Information Criterion from these model comparisons are plotted per each region, with a standard threshold of  $|\Delta AIC| > 2$  applied. In virtually every region of the brain, the SDI model outperformed the band-limited model, as indicated by  $\Delta AIC < -2$ .

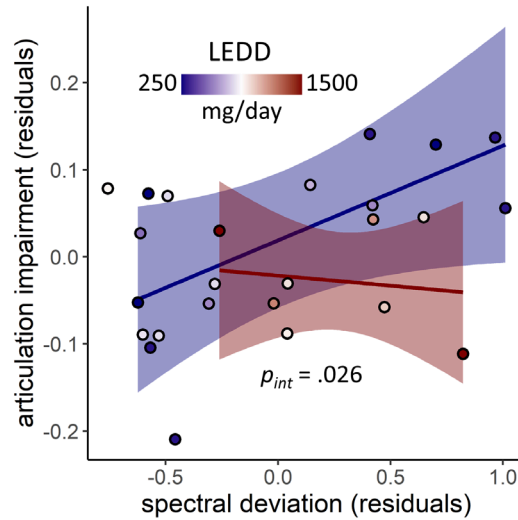

**Supplementary Figure 4. Levodopa Equivalent Daily Dose (LEDD) moderates the relationship between left inferior frontal spectral deviations and articulatory impairments.** In a subset of patients with Parkinson’s disease for whom detailed medication regimen information was available (N = 25), LEDD was found to significantly moderate the relationship between the Spectral Deviation Index (SDI) and articulatory impairments shown originally in Figure 3B. This interaction effect was such that patients taking a larger equivalent dose of levodopa exhibited a weaker positive relationship, potentially indicating a normalizing effect of dopamine replacement therapy. LEDD was treated as a continuous variable in the linear model, however, for visualization purposes lines-of-best fit and 95% confidence intervals are plotted for the first and third tertiles.

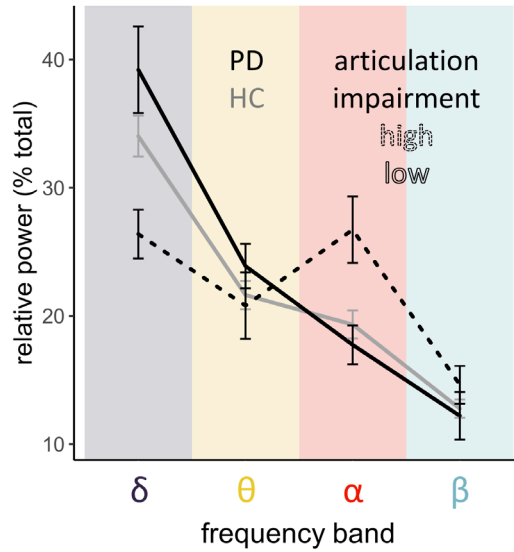

**Supplementary Figure 5. Frequency-wise differences in left inferior frontal cortex (LIFC) spectral power as a function of disease status and articulatory impairment severity.** Line plots represent the LIFC mean relative spectral power (y-axis) per frequency band (x-axis) for the healthy control participants (grey) and the patients with Parkinson’s disease (black). Error bars represent  $\pm 1$  standard error of the mean. Patients with Parkinson’s disease are further subdivided into high (dotted line, 4<sup>th</sup> quartile) and low (solid line, 1<sup>st</sup> quartile) severity of articulation impairments, to highlight the spectral deviations responsible for the relationships shown in Figure 3.

## Consortium Authors

A complete listing of **PREVENT-AD Research Group** can be found in the PREVENT-AD database:

[https://preventad.loris.ca/acknowledgements/acknowledgements.php?date=\[2022-02-01\]](https://preventad.loris.ca/acknowledgements/acknowledgements.php?date=[2022-02-01])

The members of the **Quebec Parkinson Network** are listed alphabetically below:

Isabelle Beaulieu-Boire - Université de Sherbrooke, Sherbrooke, Canada  
Pierre Blanchet - Université de Montréal, Montréal, Canada  
Sarah Bogard - Montreal Neurological Institute, McGill University, Montreal, Canada  
Manon Bouchard – Clinique NeuroLévis, Lévis, Canada  
Sylvain Chouinard - Université de Montréal, Montréal, Canada  
Francesca Cicchetti - CHU de Québec-Université Laval, Québec, Canada  
Martin Cloutier - Neuro-Rive-Sud, Longueuil, Canada  
Alain Dagher - Montreal Neurological Institute, McGill University, Montreal, Canada  
Samir Das - Montreal Neurological Institute, McGill University, Montreal, Canada  
Clotilde Degroot - Montreal Neurological Institute, McGill University, Montreal, Canada  
Alex Desautels - Université de Montréal, Montréal, Canada  
Marie Hélène Dion - Université de Montréal, Montréal, Canada  
Janelle Drouin-Ouellet - Université de Montréal, Montréal, Canada  
Anne-Marie Dufresne - CHU de Québec-Hôpital de l'Enfant-Jésus, Québec, Canada  
Nicolas Dupré - CHU de Québec-Université Laval, Québec, Canada  
Antoine Duquette - Université de Montréal, Montréal, Canada  
Thomas Durcan - Montreal Neurological Institute, McGill University, Montreal, Canada  
Lesley K. Fellows - Montreal Neurological Institute, McGill University, Montreal, Canada  
Edward Fon - Montreal Neurological Institute, McGill University, Montreal, Canada  
Jean-François Gagnon - Université du Québec à Montréal, Montréal, Canada  
Ziv Gan-Or - Montreal Neurological Institute, McGill University, Montreal, Canada  
Angela Genge - Montreal Neurological Institute, McGill University, Montreal, Canada  
Nicolas Jodoin - Centre hospitalier de l'Université de Montréal, Montréal, Canada  
Jason Karamchandani - Montreal Neurological Institute, McGill University, Montreal, Canada  
Anne-Louise Lafontaine - Montreal Neurological Institute, McGill University, Montreal, Canada  
Mélanie Langlois - CHU de Québec-Université Laval, Québec, Canada  
Etienne Leveille - Montreal Neurological Institute, McGill University, Montreal, Canada  
Martin Lévesque - Université Laval, Québec, Canada  
Calvin Melmed - McGill University, Montreal, Canada  
Oury Monchi - Université de Montréal, Montréal, Canada  
Jacques Montplaisir - Université de Montréal, Montréal, Canada  
Michel Panisset - Université de Montréal, Montréal, Canada  
Martin Parent - Université Laval, Québec, Canada  
Minh-Thy Pham-An - Hôpital Hôtel-Dieu de Saint-Jérôme, Saint-Jérôme, Canada  
Jean-Baptiste Poline - Montreal Neurological Institute, McGill University, Montreal, Canada  
Ronald Postuma - Montreal Neurological Institute, McGill University, Montreal, Canada  
Emmanuelle Pourcher - CHU de Québec-Université Laval, Québec, Canada  
Trisha Rao - McGill University, Montreal, Canada  
Jean Rivest - CHU de Québec-Université Laval, Québec, Canada  
Guy Rouleau - Montreal Neurological Institute, McGill University, Montreal, Canada

Madeleine Sharp - Montreal Neurological Institute, McGill University, Montreal, Canada

Valérie Soland - CHU de Montréal, Montréal, Canada

Michael Sidel - Montreal Neurological Institute, McGill University, Montreal, Canada

Sonia Lai Wing Sun - Montreal Neurological Institute, McGill University, Montreal, Canada

Alexander Thiel - McGill University, Montreal, Canada

Paolo Vitali - McGill University, Montreal, Canada
